# Supplementary material for: Understanding complexities in the uptake of indigenously developed rapid point-of-care diagnostics for containment of antimicrobial resistance in India
Source: PubMed Central journal article supplement — BMJ Glob Health. 2021 Sep 27;6(9):e006628. doi: 10.1136/bmjgh-2021-006628 (PMC8477250; doi:10.1136/bmjgh-2021-006628), 2021-09-27
Supplement: bmjgh-2021-006628supp001.pdf [file bmjgh-2021-006628supp001.pdf]

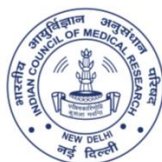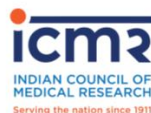

**INDIAN COUNCIL OF MEDICAL RESEARCH**  
Department of Health Research - Ministry of Health & Family Welfare  
Government of India

## **Rapid methods for antimicrobial susceptibility testing at point-of-care**

Development of novel and/or improved diagnostic methods are sought to reduce the inappropriate and blind prescription of antibiotics and consumption with appropriate guidance and monitoring. We are aware that your research group has developed a point-of-care (POC) diagnostic which identify and facilitate the detection of drug resistant pathogens. ICMR is conducting a survey to understand the landscape of available indigenous diagnostics and efforts carried by scientist or private companies. This survey is meant to identify bottleneck or other challenges that are impeding the availability of good quality diagnostics in our health care system. Through this questionnaire we are seeking the information about developed diagnostic for antimicrobial susceptibility testing at POC and its validation.

1. What type of diagnostic/ assay/ method/ product is developed?
2. What is the intended use or application of the diagnostic?
3. Please provide the information of developer (s).
4. What is the principle (technology) of developed diagnostic?
5. Please describe the novelty of diagnostic.
6. What will be the beneficiary groups for the diagnostic?  
(e.g. POC, healthcare level, clinicians, nurses, hospital management, staff, patients, educationalists/socialist, technology experts and developers, local government and policy makers etc.)

7. What is the stage of development of diagnostic?  
(*e.g. Proof of concept or objective evidence*)
8. Whether there was any association or partnership with industry or governmental organization for the development of diagnostic?  
 No       Yes, Please specify.....
9. Whether any accreditation or mark or approval is obtained for the developed diagnostic?  
 No       Yes, Please specify.....
10. How validation of diagnostic was performed (process of qualification)?  
(**Examples: For Instrument:** installation qualification (IQ), Operational qualification (OQ), Performance qualification (PQ), equipment details, service and maintenance  
**For assay:** protocol, specimen and antibiotics panel details, sample design, statistical advice/analyses, performance qualification, comparisons with alternative methods or with previously used test methods)

|                                                                                                |                                                                                                 |
|------------------------------------------------------------------------------------------------|-------------------------------------------------------------------------------------------------|
| Specimen used                                                                                  |                                                                                                 |
| Targeted pathogen (s)                                                                          |                                                                                                 |
| Antibiotics panel used                                                                         |                                                                                                 |
| Testing population, sample size and design                                                     |                                                                                                 |
| Gold standard or Reference followed or comparison (method currently or previously in use) used |                                                                                                 |
| Parameter of validation met                                                                    | Sensitivity (true positive) <input type="checkbox"/> No <input type="checkbox"/> Yes            |
|                                                                                                | Specificity (true negative) <input type="checkbox"/> No <input type="checkbox"/> Yes            |
|                                                                                                | Positive predictive value (PPV) <input type="checkbox"/> No <input type="checkbox"/> Yes        |
|                                                                                                | Negative predictive value (NPV) <input type="checkbox"/> No <input type="checkbox"/> Yes        |
|                                                                                                | uncertainty of measurement (UM) <input type="checkbox"/> No <input type="checkbox"/> Yes        |
|                                                                                                | Limit of detection(LOD) <input type="checkbox"/> No <input type="checkbox"/> Yes                |
|                                                                                                | Precision <input type="checkbox"/> No <input type="checkbox"/> Yes                              |
|                                                                                                | Linearity <input type="checkbox"/> No <input type="checkbox"/> Yes                              |
|                                                                                                | Accuracy <input type="checkbox"/> No <input type="checkbox"/> Yes                               |
|                                                                                                | Reproducibility (Robustness) <input type="checkbox"/> No <input type="checkbox"/> Yes           |
|                                                                                                | Analytical sensitivity and specificity <input type="checkbox"/> No <input type="checkbox"/> Yes |
|                                                                                                | Limit of quantitation (LOQ) <input type="checkbox"/> No <input type="checkbox"/> Yes            |
|                                                                                                | Any Other, if any                                                                               |
| Results Turnaround time                                                                        |                                                                                                 |
| How many tests can be performed (minimum & maximum) in a standard six hour working shift?      |                                                                                                 |
| Hands on time per unit test                                                                    |                                                                                                 |

|                                                                                                |                                                                                |
|------------------------------------------------------------------------------------------------|--------------------------------------------------------------------------------|
| Stability/ shelf life tested                                                                   | <input type="checkbox"/> No <input type="checkbox"/> Yes, please specify.....  |
| Any cross or collaborator laboratory test validation                                           | <input type="checkbox"/> No <input type="checkbox"/> Yes, please specify ..... |
| Quality control parameters met                                                                 |                                                                                |
| Is there any test results available for samples which challenge the performance of the method? | <input type="checkbox"/> No <input type="checkbox"/> Yes, please specify ..... |
| Any IPR/copyright issues worth mentioning?                                                     |                                                                                |
| Limitation, if any                                                                             |                                                                                |

11. Is developed diagnostic available in public domain in any form?  
(*e.g. published, controlled distribution, patent etc.*)
  
12. Whether cost benefit analysis done or not?
  
13. Whether associated risk assessment evaluated or not?  
(*e.g. any risk of new procedure or additional hazards arise throughout the course of the evaluation which were not identified during the initial risk assessment?*)
  
14. Any other information related to your developed diagnostic, you wish to provide.

Name:.....

Designation:.....

Date:.....

Signature:.....
